# Supplementary material for: phasebook: haplotype-aware de novo assembly of diploid genomes from long reads
Source: PubMed Central journal article supplement (PMC8549298; doi:10.1186/s13059-021-02512-x), 2021-10-27
Supplement: 13059_2021_2512_MOESM1_ESM.pdf [file 13059_2021_2512_MOESM1_ESM.pdf]

Supplementary Material  
phasebook: haplotype-aware *de novo* assembly of diploid genomes from long  
reads

Xiao Luo<sup>1,2,†</sup>, Xiongbin Kang<sup>1,2,†</sup>, Alexander Schönhuth<sup>1,2,\*</sup>

<sup>1</sup> Centrum Wiskunde & Informatica, Amsterdam, The Netherlands

<sup>2</sup> Genome Data Science, Faculty of Technology, Bielefeld University, Bielefeld, Germany

†These authors contributed equally to the work.

\*To whom correspondence should be addressed.

**Table S1.** Contig length statistics on PacBio HiFi data. #Contigs indicates the number of contigs.

| Dataset                         | Assembler       | #Contigs | #Contigs<br>( $\geq 50$ Kb) | #Contigs<br>( $\geq 500$ Kb) | N50 (Kb) | N90 (Kb) |
|---------------------------------|-----------------|----------|-----------------------------|------------------------------|----------|----------|
| MHC<br>(HiFi 15x)               | phasebook       | 32       | 31                          | 9                            | 501      | 157      |
|                                 | Canu            | 58       | 19                          | 3                            | 680      | 94       |
|                                 | Flye            | 17       | 9                           | 4                            | 828      | 292      |
|                                 | Hifiasm         | 2        | 2                           | 2                            | 4878     | 4799     |
|                                 | IPA             | 25       | 16                          | 5                            | 1427     | 165      |
|                                 | Wtdbg2          | 2        | 2                           | 2                            | 3347     | 1382     |
|                                 | <i>HapCut2</i>  | 82       | 42                          | 0                            | 258      | 52       |
|                                 | <i>WhatsHap</i> | 82       | 42                          | 0                            | 258      | 52       |
| HG00733<br>(Chr6)<br>(HiFi 18x) | phasebook       | 1412     | 1380                        | 205                          | 450      | 99       |
|                                 | Canu            | 2386     | 639                         | 61                           | 1165     | 36       |
|                                 | Flye            | 39       | 29                          | 20                           | 16248    | 3368     |
|                                 | Hifiasm         | 87       | 38                          | 17                           | 28008    | 20361    |
|                                 | IPA             | 1050     | 399                         | 60                           | 11997    | 121      |
|                                 | Wtdbg2          | 32       | 16                          | 9                            | 33738    | 17235    |
|                                 | <i>HapCut2</i>  | 1886     | 1350                        | 164                          | 379      | 72       |
|                                 | <i>WhatsHap</i> | 1886     | 1348                        | 166                          | 381      | 70       |
| HG002<br>(HiFi 14x)             | phasebook       | 53216    | 47460                       | 310                          | 134      | 91       |
|                                 | Canu            | 267      | 226                         | 173                          | 48483    | 8683     |
|                                 | Falcon          | 2004     | 987                         | 250                          | 33505    | 3001     |
|                                 | Hifiasm         | 383      | 185                         | 103                          | 98166    | 18089    |
|                                 | <i>HapCut2</i>  | 6732     | 674                         | 116                          | 145139   | 58618    |
|                                 | <i>WhatsHap</i> | 6732     | 674                         | 116                          | 145139   | 58618    |

**Table S2.** Contig length statistics on PacBio CLR data.

| <b>Dataset</b>                 | <b>Assembler</b> | <b>#Contigs</b> | <b>#Contigs<br/>(<math>\geq 50</math> Kb)</b> | <b>#Contigs<br/>(<math>\geq 500</math> Kb)</b> | <b>N50 (Kb)</b> | <b>N90 (Kb)</b> |
|--------------------------------|------------------|-----------------|-----------------------------------------------|------------------------------------------------|-----------------|-----------------|
| MHC<br>(CLR 25x)               | phasebook        | 108             | 66                                            | 0                                              | 146             | 46              |
|                                | phasebook-hi     | 62              | 59                                            | 0                                              | 299             | 162             |
|                                | Canu             | 23              | 5                                             | 2                                              | 2184            | 45              |
|                                | Falcon           | 14              | 4                                             | 1                                              | 4814            | 184             |
|                                | Flye             | 9               | 7                                             | 4                                              | 935             | 549             |
|                                | Wtdbg2           | 1               | 1                                             | 1                                              | 4726            | 4726            |
|                                | <i>HapCut2</i>   | 38              | 28                                            | 4                                              | 393             | 155             |
|                                | <i>WhatsHap</i>  | 34              | 28                                            | 4                                              | 393             | 234             |
| HG00733<br>(Chr6)<br>(CLR 44x) | phasebook        | 2755            | 2373                                          | 58                                             | 218             | 88              |
|                                | phasebook-hi     | 573             | 560                                           | 190                                            | 724             | 277             |
|                                | Canu             | 123             | 109                                           | 15                                             | 18252           | 4241            |
|                                | Falcon           | 214             | 196                                           | 16                                             | 19121           | 881             |
|                                | Flye             | 39              | 31                                            | 18                                             | 21573           | 3223            |
|                                | Wtdbg2           | 279             | 44                                            | 26                                             | 11927           | 2282            |
|                                | <i>HapCut2</i>   | 210             | 206                                           | 122                                            | 3900            | 910             |
|                                | <i>WhatsHap</i>  | 234             | 228                                           | 126                                            | 3349            | 841             |
| HG002<br>(CLR 25x)             | phasebook        | 77672           | 39836                                         | 151                                            | 104             | 34              |
|                                | phasebook-hi     | 30381           | 27566                                         | 1799                                           | 301             | 104             |
|                                | Canu             | 4188            | 3589                                          | 466                                            | 14096           | 292             |
|                                | <i>HapCut2</i>   | 6732            | 674                                           | 116                                            | 145139          | 58618           |
|                                | <i>WhatsHap</i>  | 6732            | 674                                           | 116                                            | 145139          | 58618           |
| A. thaliana<br>(CLR 75x)       | phasebook        | 6205            | 2115                                          | 1                                              | 56              | 26              |
|                                | phasebook-hi     | 1686            | 1393                                          | 66                                             | 258             | 83              |
|                                | Canu             | 2316            | 1195                                          | 80                                             | 204             | 42              |
|                                | Flye             | 3027            | 680                                           | 29                                             | 157             | 24              |
|                                | Wtdbg2           | 3533            | 828                                           | 0                                              | 55              | 17              |
|                                | <i>HapCut2</i>   | 10              | 10                                            | 10                                             | 23460           | 18585           |
|                                | <i>WhatsHap</i>  | 10              | 10                                            | 10                                             | 23460           | 18585           |

**Table S3.** Contig length statistics on ONT data.

| Dataset                        | Assembler       | #Contigs | #Contigs<br>( $\geq 50$ Kb) | #Contigs<br>( $\geq 500$ Kb) | N50 (Kb) | N90 (Kb) |
|--------------------------------|-----------------|----------|-----------------------------|------------------------------|----------|----------|
| MHC<br>(ONT 25x)               | phasebook       | 177      | 108                         | 0                            | 109      | 42       |
|                                | phasebook-hi    | 40       | 38                          | 11                           | 612      | 165      |
|                                | Canu            | 15       | 11                          | 2                            | 3490     | 95       |
|                                | Falcon          | 15       | 10                          | 2                            | 2490     | 182      |
|                                | Flye            | 7        | 5                           | 4                            | 1274     | 793      |
|                                | Shasta          | 3        | 3                           | 2                            | 3860     | 957      |
|                                | Wtdbg2          | 10       | 2                           | 1                            | 4822     | 4822     |
|                                | <i>HapCut2</i>  | 40       | 22                          | 6                            | 494      | 234      |
|                                | <i>WhatsHap</i> | 36       | 24                          | 6                            | 494      | 234      |
| NA19240<br>(Chr6)<br>(ONT 26x) | phasebook       | 5723     | 3415                        | 0                            | 84       | 36       |
|                                | phasebook-hi    | 3445     | 2420                        | 9                            | 130      | 48       |
|                                | Canu            | 146      | 97                          | 48                           | 5022     | 1052     |
|                                | Falcon          | 397      | 196                         | 49                           | 4764     | 249      |
|                                | Flye            | 64       | 50                          | 26                           | 11457    | 2437     |
|                                | Shasta          | 779      | 145                         | 80                           | 2213     | 513      |
|                                | Wtdbg2          | 385      | 32                          | 21                           | 15481    | 2529     |
|                                | <i>HapCut2</i>  | 40       | 32                          | 24                           | 27552    | 15696    |
|                                | <i>WhatsHap</i> | 40       | 32                          | 24                           | 27552    | 15696    |
| HG002<br>(ONT 38x)             | phasebook       | 30473    | 18766                       | 3022                         | 428      | 74       |
|                                | Canu            | 779      | 677                         | 197                          | 33065    | 5992     |
|                                | Flye            | 2031     | 809                         | 208                          | 33316    | 4905     |
|                                | Shasta          | 17423    | 662                         | 255                          | 23346    | 3698     |
|                                | Wtdbg2          | 5311     | 1199                        | 386                          | 15381    | 1343     |

| Dataset   | Assembler       | Size (Mb) | Haplotype coverage(%) | k-mer recovery(%) |      |      | Continuity (bp) |            | QV   | Switch error(%) | N (%) | Dup (%) |
|-----------|-----------------|-----------|-----------------------|-------------------|------|------|-----------------|------------|------|-----------------|-------|---------|
|           |                 |           |                       | All               | Mat  | Pat  | NGA50           | Phased N50 |      |                 |       |         |
| MHC (15x) | phasebook       | 10.4      | 95.7                  | 96.7              | 82.6 | 79.5 | 159789          | 136629     | 27.0 | 1.33            | 0.0   | 1.25    |
|           | Canu            | 5.6       | 56.4                  | 95.0              | 73.6 | 69.9 | 46877           | 90512      | 35.6 | 5.48            | 0.0   | 1.01    |
|           | Falcon          | 5.5       | 57.1                  | 94.2              | 67.6 | 71.0 | 50216           | 101936     | 31.5 | 5.46            | 0.0   | 0.96    |
|           | Flye            | 5.0       | 53.6                  | 94.3              | 69.8 | 66.5 | 9724            | 75778      | 35.6 | 4.48            | 0.0   | 0.91    |
|           | Wtdbg2          | 4.7       | 52.4                  | 90.0              | 40.3 | 62.1 | -               | 102169     | 31.1 | 4.59            | 0.0   | 0.94    |
|           | <i>HapCut2</i>  | 9.1       | 56.3                  | 84.2              | 53.5 | 53.2 | 254386          | 279136     | 31.2 | 5.29            | 8.9   | 1.52    |
|           | <i>WhatsHap</i> | 9.2       | 56.5                  | 84.2              | 52.9 | 53.4 | 254386          | 239601     | 31.1 | 5.47            | 8.8   | 1.52    |
| MHC (25x) | phasebook       | 10.8      | 95.2                  | 96.7              | 88.0 | 76.3 | 172577          | 133141     | 37.7 | 0.66            | 0.0   | 1.36    |
|           | Canu            | 5.9       | 59.2                  | 96.3              | 80.7 | 76.9 | 62395           | 65217      | 39.4 | 4.57            | 0.0   | 0.92    |
|           | Falcon          | 5.4       | 60.5                  | 94.3              | 82.2 | 68.8 | 32719           | 120818     | 27.6 | 5.24            | 0.0   | 1.17    |
|           | Flye            | 5.0       | 74.1                  | 94.2              | 64.2 | 70.5 | 66242           | 74992      | 37.1 | 5.34            | 0.0   | 1.01    |
|           | Wtdbg2          | 4.7       | 58.9                  | 90.5              | 46.9 | 63.2 | -               | 102431     | 33.0 | 5.49            | 0.0   | 0.93    |
|           | <i>HapCut2</i>  | 9.1       | 56.4                  | 84.2              | 53.7 | 53.0 | 254386          | 282817     | 31.3 | 5.93            | 8.9   | 1.52    |
|           | <i>WhatsHap</i> | 9.2       | 56.6                  | 84.2              | 53.4 | 53.2 | 254386          | 279136     | 31.2 | 5.62            | 8.8   | 1.52    |
| MHC (35x) | phasebook       | 12.3      | 97.2                  | 98.6              | 94.1 | 89.7 | 93110           | 74779      | 38.7 | 0.79            | 0.0   | 1.53    |
|           | Canu            | 5.8       | 66.9                  | 96.3              | 79.5 | 78.0 | 293779          | 101163     | 41.1 | 4.39            | 0.0   | 0.91    |
|           | Falcon          | 5.6       | 64.5                  | 94.8              | 73.1 | 70.5 | 120422          | 92301      | 32.4 | 5.53            | 0.0   | 1.00    |
|           | Flye            | 5.0       | 53.2                  | 93.9              | 68.5 | 63.8 | 19559           | 67205      | 37.6 | 4.91            | 0.0   | 0.81    |
|           | Wtdbg2          | 4.8       | 70.0                  | 91.6              | 48.6 | 61.3 | -               | 113890     | 31.4 | 4.81            | 0.0   | 0.96    |
|           | <i>HapCut2</i>  | 9.1       | 56.4                  | 84.3              | 54.6 | 53.0 | 254386          | 282806     | 31.3 | 5.53            | 8.9   | 1.52    |
|           | <i>WhatsHap</i> | 9.2       | 56.6                  | 84.3              | 54.6 | 53.0 | 254386          | 284756     | 31.2 | 5.29            | 8.9   | 1.52    |
| MHC (45x) | phasebook       | 12.0      | 96.0                  | 99.2              | 96.3 | 94.4 | 88122           | 75294      | 41.2 | 0.62            | 0.0   | 1.53    |
|           | Canu            | 6.1       | 60.7                  | 96.9              | 82.1 | 83.1 | 120333          | 94921      | 41.8 | 3.26            | 0.0   | 0.94    |
|           | Falcon          | 5.7       | 59.3                  | 95.2              | 73.3 | 74.8 | 93028           | 175191     | 32.5 | 5.34            | 0.0   | 0.85    |
|           | Flye            | 4.9       | 61.7                  | 93.7              | 60.0 | 69.4 | 22165           | 95682      | 37.2 | 6.28            | 0.0   | 0.96    |
|           | Wtdbg2          | 4.8       | 51.6                  | 91.3              | 48.0 | 61.7 | -               | 134956     | 32.8 | 5.16            | 0.0   | 0.90    |
|           | <i>HapCut2</i>  | 9.2       | 56.4                  | 84.3              | 53.7 | 53.4 | 254386          | 279136     | 31.2 | 5.71            | 8.9   | 1.52    |
|           | <i>WhatsHap</i> | 9.2       | 57.4                  | 84.3              | 53.3 | 53.9 | 254385          | 278832     | 31.2 | 5.48            | 8.8   | 1.50    |

**Table S4.** Benchmarking results for PacBio CLR reads with different sequencing coverage. The two MHC sequences (psuedo-diploid) were used to simulate long reads with sequencing coverage per haplotype 15x, 25x, 35x and 45x, respectively.

| Dataset                  | Correct reads | Size (Mb) | Haplotype coverage(%) | k-mer recovery(%) |      |      | Continuity (bp) |            | QV   | Switch error(%) | N (%) | Dup (%) |
|--------------------------|---------------|-----------|-----------------------|-------------------|------|------|-----------------|------------|------|-----------------|-------|---------|
|                          |               |           |                       | All               | Mat  | Pat  | NGA50           | Phased N50 |      |                 |       |         |
| MHC (CLR 25x)            | yes           | 10.8      | 95.2                  | 96.7              | 88.0 | 76.3 | 172577          | 133141     | 37.7 | 0.66            | 0.0   | 1.36    |
|                          | no            | 12.3      | 96.3                  | 97.7              | 87.6 | 87.9 | 92188           | 71443      | 36.9 | 0.90            | 0.0   | 1.64    |
| HG00733 (Chr6) (CLR 44x) | yes           | 453.2     | 92.9                  | 98.7              | 89.7 | 90.6 | 253785          | 164373     | 32.6 | 5.50            | 0.0   | 1.92    |
|                          | no            | 327.3     | 84.8                  | 97.3              | 70.8 | 71.8 | 221246          | 129731     | 30.0 | 12.26           | 0.0   | 1.59    |

**Table S5.** Benchmarking results for running phasebook whether using the option 'Correct errors for raw reads' or not.

| Dataset                         | Assembler       | CPU time (h) | peak memory usage (GB) |
|---------------------------------|-----------------|--------------|------------------------|
| MHC<br>(HiFi 15x)               | phasebook       | 1.1          | 4.1                    |
|                                 | Canu            | 0.4          | 4.2                    |
|                                 | Flye            | 1.3          | 2.4                    |
|                                 | Hifiasm         | 0.7          | 16.2                   |
|                                 | IPA             | 0.4          | 0.6                    |
|                                 | Wtdbg2          | 0.3          | 0.5                    |
|                                 | <i>HapCut2</i>  | 0.4          | 0.9                    |
|                                 | <i>WhatsHap</i> | 0.1          | 0.8                    |
| HG00733<br>(Chr6)<br>(HiFi 18x) | phasebook       | 64.8         | 27.3                   |
|                                 | Canu            | 14.8         | 29.9                   |
|                                 | Flye            | 41.0         | 33.2                   |
|                                 | Hifiasm         | 41.6         | 18.9                   |
|                                 | IPA             | 14.4         | 16.9                   |
|                                 | Wtdbg2          | 22.8         | 8.1                    |
|                                 | <i>HapCut2</i>  | 2.9          | 6.0                    |
|                                 | <i>WhatsHap</i> | 2.2          | 6.0                    |
| HG002<br>(HiFi 14x)             | phasebook       | 6636.6       | 85.4                   |
|                                 | Hifiasm         | 357.3        | 142.9                  |
|                                 | <i>HapCut2</i>  | 116.1        | 23.7                   |
|                                 | <i>Whatshap</i> | 41.2         | 23.7                   |

**Table S6.** Runtime and memory usage for PacBio HiFi reads. The running time of Hifiasm is from their work (Cheng *et al.* 2021). The running time of reference-guided methods (HapCut2, WhatsHap) sums up the time of all steps such as read alignment, variant calling and phasing, and contig generation.

| Dataset                        | Assembler       | CPU time (h) | peak memory usage (GB) |
|--------------------------------|-----------------|--------------|------------------------|
| MHC<br>(CLR 25x)               | phasebook       | 15.7         | 35.2                   |
|                                | phasebook-hi    | 3.2          | 4.9                    |
|                                | Canu            | 10.2         | 6.1                    |
|                                | Falcon          | 3.9          | 10.4                   |
|                                | Flye            | 1.7          | 5.6                    |
|                                | Wtdbg2          | 0.6          | 0.6                    |
|                                | <i>HapCut2</i>  | 0.5          | 1.8                    |
|                                | <i>WhatsHap</i> | 0.2          | 1.8                    |
| HG00733<br>(Chr6)<br>(CLR 44x) | phasebook       | 1129.2       | 41.8                   |
|                                | phasebook-hi    | 546.9        | 35.5                   |
|                                | Canu            | 681.7        | 27.4                   |
|                                | Falcon          | 1006.0       | 23.6                   |
|                                | Flye            | 103.7        | 46.9                   |
|                                | Wtdbg2          | 22.7         | 13.5                   |
|                                | <i>HapCut2</i>  | 7.8          | 7.6                    |
|                                | <i>WhatsHap</i> | 7.6          | 7.7                    |
| HG002<br>(CLR 25x)             | phasebook       | 7212.7       | 73.2                   |
|                                | phasebook-hi    | 28356.9      | 79.4                   |
|                                | Canu            | 31933.0      | 79.4                   |
|                                | <i>HapCut2</i>  | 179.5        | 32.7                   |
|                                | <i>WhatsHap</i> | 116.2        | 32.7                   |
| A. thaliana<br>(CLR 75x)       | phasebook       | 1261.9       | 37.5                   |
|                                | phasebook-hi    | 434.6        | 63.6                   |
|                                | Canu            | 489.9        | 13.4                   |
|                                | Flye            | 11.9         | 76.8                   |
|                                | Wtdbg2          | 8.3          | 27.7                   |
|                                | <i>HapCut2</i>  | 14.1         | 11.4                   |
|                                | <i>WhatsHap</i> | 6.0          | 11.4                   |

**Table S7.** Runtime and memory usage for PacBio CLR reads. Note that the runtime of phasebook-hi is the total time of Canu’s error correction & trim step plus running phasebook with HiFi mode.

| Dataset                        | Assembler       | CPU time (h) | peak memory usage (GB) |
|--------------------------------|-----------------|--------------|------------------------|
| MHC<br>(ONT 25x)               | phasebook       | 48.4         | 5.2                    |
|                                | phasebook-hi    | 3.2          | 5.5                    |
|                                | Canu            | 51.0         | 6.4                    |
|                                | Falcon          | 6.3          | 10.1                   |
|                                | Flye            | 1.0          | 5.5                    |
|                                | Shasta          | 0.2          | 1.1                    |
|                                | Wtdbg2          | 0.3          | 0.8                    |
|                                | <i>HapCut2</i>  | 0.6          | 1.7                    |
|                                | <i>WhatsHap</i> | 0.2          | 1.6                    |
| NA19240<br>(Chr6)<br>(ONT 26x) | phasebook       | 726.6        | 47.1                   |
|                                | phasebook-hi    | 770.6        | 26.1                   |
|                                | Canu            | 1099.0       | 12.2                   |
|                                | Falcon          | 507.6        | 23.6                   |
|                                | Flye            | 66.1         | 45.5                   |
|                                | Shasta          | 4.7          | 29.9                   |
|                                | Wtdbg2          | 25.5         | 11.4                   |
|                                | <i>HapCut2</i>  | 165.2        | 23.4                   |
|                                | <i>WhatsHap</i> | 12.5         | 23.4                   |
| HG002<br>(ONT 38x)             | phasebook       | 19564.4      | 78.8                   |

**Table S8.** Runtime and memory usage for ONT reads.

| Dataset                        | Correct reads | CPU time (h) | peak memory usage (GB) |
|--------------------------------|---------------|--------------|------------------------|
| MHC<br>(CLR 25x)               | yes           | 22.0         | 35.3                   |
|                                | no            | 5.9          | 34.6                   |
| HG00733<br>(Chr6)<br>(CLR 44x) | yes           | 1129.2       | 41.8                   |
|                                | no            | 270.6        | 32.8                   |

**Table S9.** Runtime and memory usage for running phasebook whether using the option 'Correct errors for raw reads' or not.

| Assemblers   | HiFi   | CLR    | ONT    |
|--------------|--------|--------|--------|
| phasebook    | 0.0000 | 0.0000 | 0.0003 |
| phasebook-hi | 0.0000 | 0.0000 | 0.0000 |
| Flye         | 0.0002 | 0.0003 | 0.0005 |
| Hifiasm      | 0.0003 | -      | -      |
| Wtdbg2       | 0.0007 | 0.0096 | 0.0172 |
| WhatsHap     | 0.0015 | 0.0001 | 0.0001 |
| HapCut2      | 0.0016 | 0.0001 | 0.0001 |
| IPA          | 0.0137 | -      | -      |
| Falcon       | -      | 0.0001 | 0.0031 |
| Canu         | 0.0177 | 0.0001 | 0.0009 |
| Shasta       | -      | -      | 0.0087 |

**Table S10.** The proportion of short contigs (< 20Kb) in the assemblies. The proportion is equal to the total length of short contigs divided by the total length of all contigs in the assembly. Here, we report the statistics of Chr6.

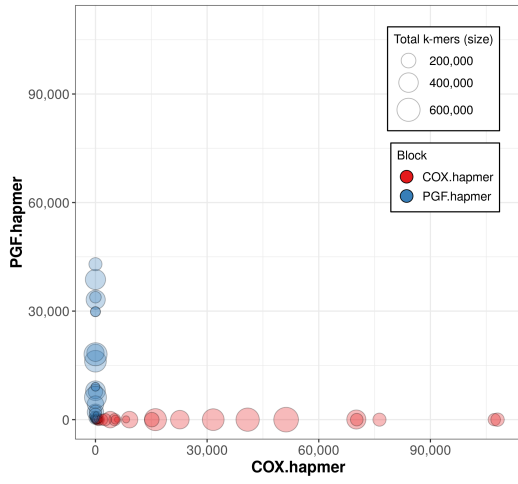

(a) MHC (HiFi)

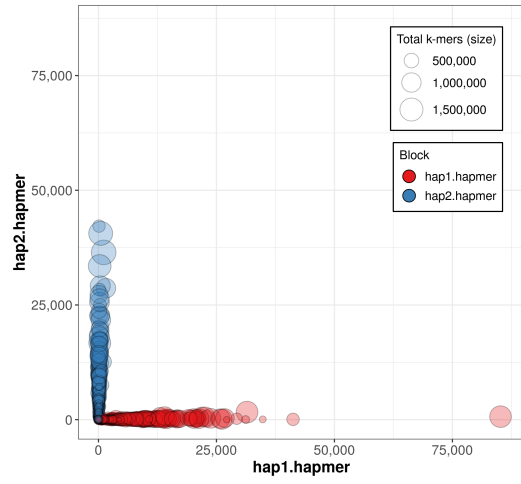

(b) HG00733:Chr6 (HiFi)

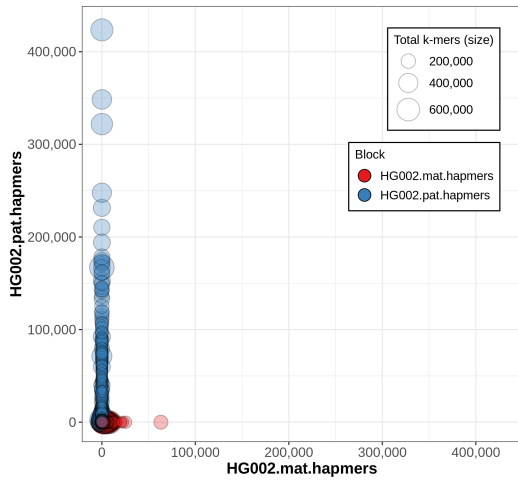

(c) HG002 (HiFi)

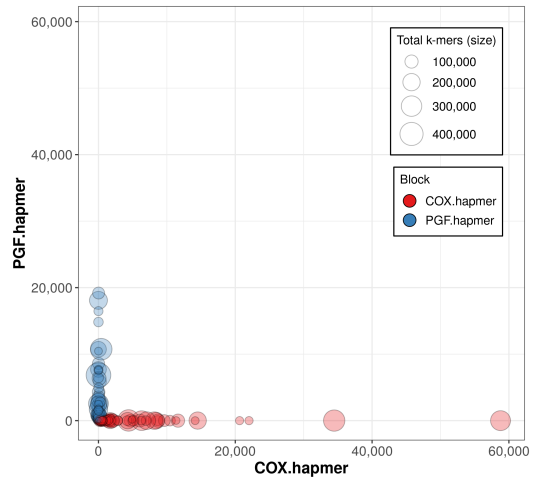

(d) MHC (CLR)

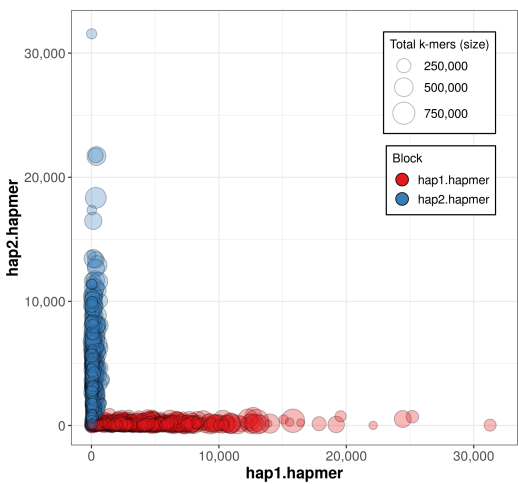

(e) HG00733:Chr6 (CLR)

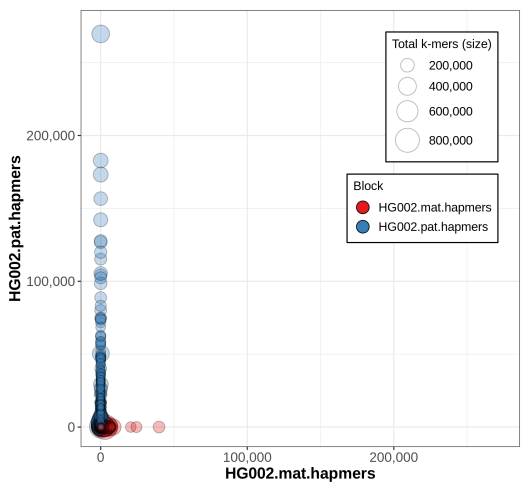

(f) HG002 (CLR)



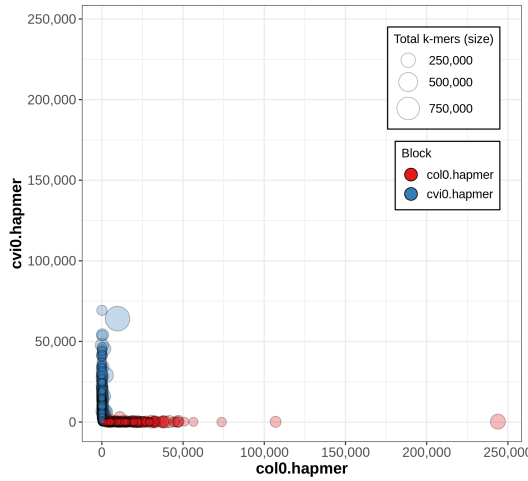

(g) *A. thaliana* (CLR)

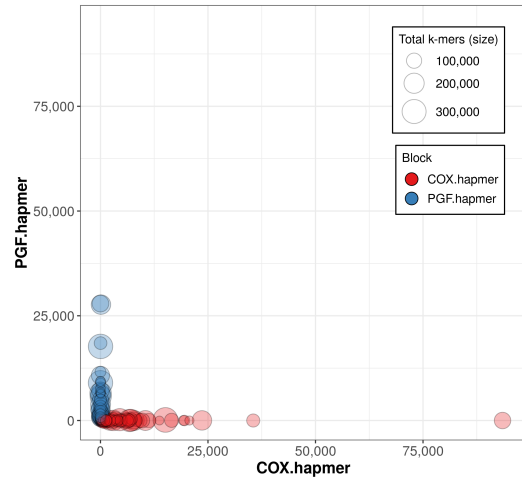

(h) MHC (ONT)

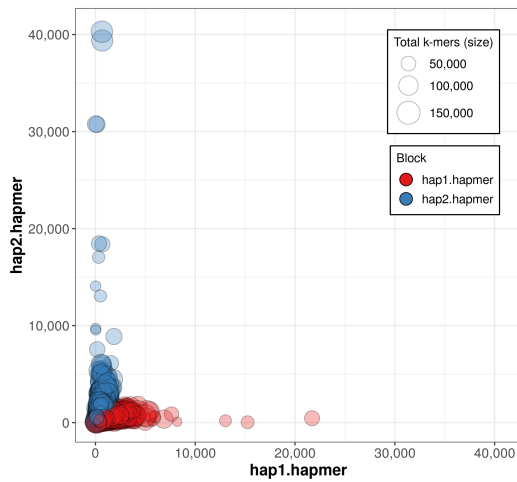

(i) NA19240:Chr6 (ONT)

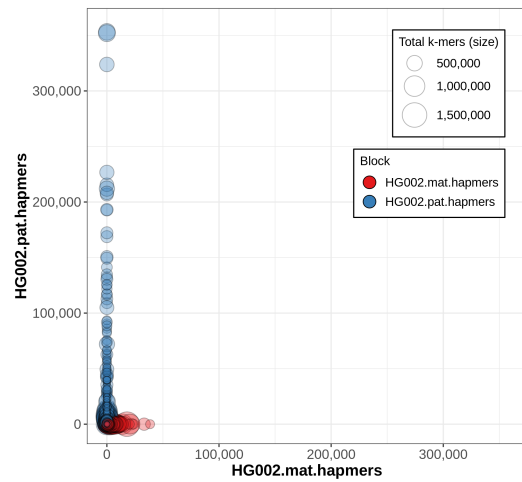

(j) HG002 (ONT)

**Figure S1.** Hap-mer blob plot for assemblies generated with phasebook in Table 1-3. Each circle represents a contig and its size is relative to the contig length. The color indicates maternal or paternal. The x or y axis represents the number of hap-mers found.

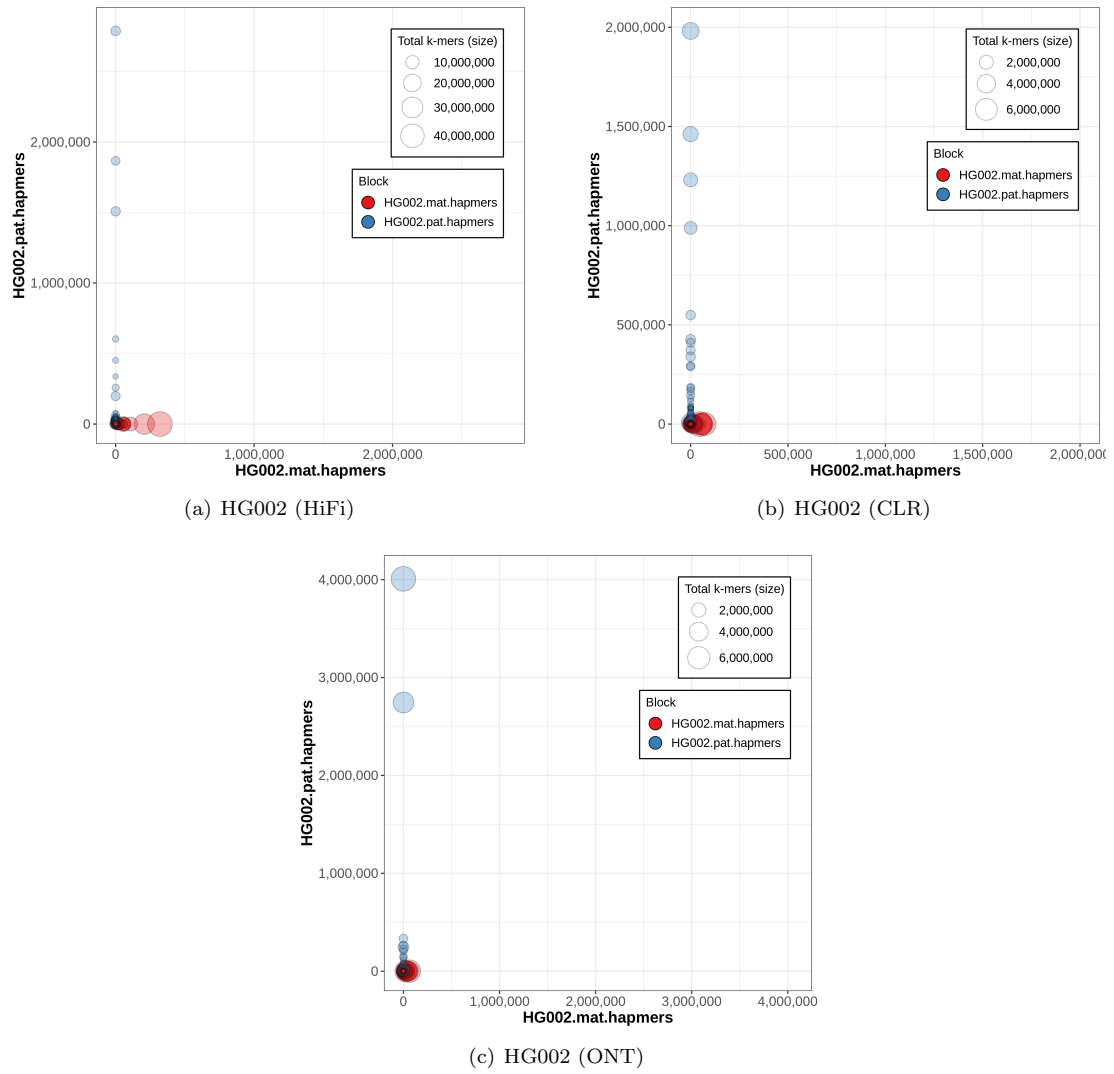

**Figure S2.** Hap-mer blob plot for HG002 assemblies generated with Canu in Table 1-3.

## Commands and versions of tools used for comparison

- phasebook v1.0  
Reproducible commands used to run phasebook on each dataset are available at Code Ocean: <https://doi.org/10.24433/CO.6031956.v2>. See the script `/code/reproduce.sh` for the details.
- Canu v2.1.1  
`Canu -p $prefix genomeSize=$genomesize -pacbio-hifi $fq`  
`Canu -p $prefix genomeSize=$genomesize -pacbio $fq`  
`Canu -p $prefix genomeSize=$genomesize -nanopore $fq`
- Falcon v1.3.0  
`fc_run falcon.cfg`
- Flye v2.8.2-b1689  
`Flye --pacbio-hifi/--pacbio-raw/--nano-raw $fq --keep-haplotypes`  
`--genome-size=$genomesize --iterations 2`
- Wtdbg2 v2.5-h8b12597  
`Wtdbg2 -x css/rs/ont -g $genomesize -i $fq -fo out`  
`wtpoa-cns -i out.ctg.lay.gz -fo out.ctg.fa`
- Hifiasm v0.15.4-r343  
`hifiasm -o $prefix $fq`
- IPA v1.3.1  
`ipa local -i $fq`
- Shasta v0.1.0  
`Shasta --input $fq --output out`
- WhatsHap v0.18  
`WhatsHap phase -o $phased_vcf --reference $ref --ignore-read-groups $vcf $bam`
- HapCut2 v1.3.2  
`HAPCUT2 --ea 1 --fragments fragment.out --VCF $vcf --output haplotype.out`
- QUAST v5.1.0rc1  
We set `--min-contig 20000`, but it has negligible effects on the results (see Table S10).
  - For MHCs  
`quast.py -r $ref --ambiguity-usage all --ambiguity-score 0.999 --min-contig 20000 $fa`
  - For Chr6  
`quast-lg.py -r $ref --ambiguity-usage all --ambiguity-score 0.999 --min-contig 20000 $fa`
  - For reference-guided methods (HapCut2, WhatsHap)  
`quast.py -r $ref --ambiguity-usage one --ambiguity-score 0.999 --min-contig 20000 $fa`
- Merqury v1.3  
For evaluating *A. thaliana* and HG002, we used the pre-built meryl dbs which are available at [https://obj.umiacs.umd.edu/marbl\\_publications/merqury/index.html](https://obj.umiacs.umd.edu/marbl_publications/merqury/index.html). Whereas for MHC and Chr6, we simulated Illumina reads for both haplotypes since the ground truth is known, and then prepared meryl dbs using code:  

```
# 1. Build meryl dbs
for each read$i.fastq.gz
do
    meryl k=21 count output read$i.meryl read$i.fastq.gz
done
```

```
# 2. Merge
meryl union-sum output $genome.meryl read*.meryl
```

Then run Merqury for evaluation:

```
merqury.sh $readdb $mat $pat assembly.fa
```

Simulate Illumina reads:

```
art_illumina -ss HS25 -p -sam -i $ref_name.fa -f 50 -o reads.$ref_name --errfree
-l 150 -m 200 -s 10 -qs 10 -qs2 10
```
